# Supplementary material for: Cost-Effectiveness of a Problem-Solving Intervention Aimed to Prevent Sickness Absence among Employees with Common Mental Disorders or Occupational Stress
Source: MDPI journal article supplement (doi:10.3390/ijerph17145234), 2020-07-20
Supplement: s1 [file s1]

**Table S2.** Other interventions that employees received beside PSI or CAU at baseline, 6-months and 12 months

|                     | Baseline |    |          |    | 6-months |    |          |    | 12-months |    |          |    |
|---------------------|----------|----|----------|----|----------|----|----------|----|-----------|----|----------|----|
|                     | PSI      |    | CAU      |    | PSI      |    | CAU      |    | PSI       |    | CAU      |    |
|                     | <i>n</i> | %  | <i>n</i> | %  | <i>n</i> | %  | <i>n</i> | %  | <i>n</i>  | %  | <i>n</i> | %  |
| Medical doctor      | 24       | 59 | 30       | 51 | 22       | 65 | 40       | 77 | 9         | 27 | 23       | 46 |
| Psychologist        | 15       | 37 | 23       | 39 | 22       | 65 | 37       | 71 | 10        | 30 | 24       | 48 |
| Welfare officer     | 8        | 20 | 5        | 9  | 11       | 32 | 10       | 19 | 5         | 15 | 3        | 6  |
| Physiotherapist     | 4        | 10 | 7        | 12 | 4        | 12 | 10       | 19 | 2         | 6  | 4        | 8  |
| Alternative         | 14       | 34 | 10       | 17 | 13       | 38 | 28       | 54 | 8         | 24 | 28       | 56 |
| Other               | 7        | 17 | 10       | 17 | 4        | 12 | 9        | 17 | 8         | 24 | 9        | 18 |
| No co-interventions | 12       | 31 | 20       | 35 | 3        | 9  | 3        | 6  | 15        | 46 | 17       | 34 |

PSI = problem-solving intervention; CAU = care as usual

Alternative: e.g. meditation, yoga and acupuncture.

Other: e.g. massage, course in stress-management, medication, relaxation exercises.
